# Supplementary material for: Capillary imbibition of confined monodisperse emulsions in microfluidic channels
Source: Royal Society of Chemistry journal article supplement (doi:10.1039/d4sm00179f), 2024-01-01
Supplement: d4sm00179f1.pdf [file d4sm00179f1.pdf]

# Supplementary information for

## Capillary imbibition of confined monodisperse emulsion in microfluidic channels

Masoud Norouzi Darabad,<sup>a</sup> Sagnik Singha,<sup>b</sup> Siva A. Vanapalli,<sup>a</sup> Mark W. Vaughn<sup>a</sup> and Jerzy Blawdziewicz,<sup>bc</sup>

<sup>a</sup> Department of Chemical Engineering, Texas Tech University, Box 43121 Lubbock, TX 79409, USA.

<sup>b</sup> Department of Mechanical Engineering, Texas Tech University, Box 41021, Lubbock, TX 79409, USA.

<sup>c</sup> Department of Physics and Astronomy, Texas Tech University, Box 41051, Lubbock, TX 79409, USA

### List of experiments conducted in this study:

Tables S1 and S2 detail the experiments performed for confinement ratios of  $d/H=1.2$  and  $d/H=0.65$ , respectively. The term "bulk volume fraction" describes the initial volume fraction of the stock emulsions prepared for the capillary experiments. The starting emulsion was prepared at a 50% volume fraction, which was then diluted to 40%, 30%, 20%, and 10% by adding 2 wt% SDS solutions. Despite the similar densities of the dispersed and continuous phases, creaming of the dispersed phase to the top of the stock solutions was observed. This issue was addressed by thorough mixing with a pipette before conducting the experiments. Nevertheless, the quality of mixing and sampling of the emulsion may contribute to the observed variability in area fractions across different experiments, even when the same nominal stock concentrations were used. The true area fraction of droplets within the channels was determined by counting the droplets and dividing by the total area of the observed window. For strongly confined droplets ( $d/H=1.2$ ), any clear fluid region was excluded from the total area fraction of the observable window, if present in a snapshot. For  $d/H=0.65$ , the measurement of area fractions commenced once the dense region moved beyond the observable window.

| confinement (d/H) | Recording location | Bulk volume fraction | Area fraction |
|-------------------|--------------------|----------------------|---------------|
| 1.2               | Location 1         | 0.5                  | 0.47          |
| 1.2               | Location 1         | 0.4                  | 0.38          |
| 1.2               | Location 1         | 0.3                  | 0.36          |
| 1.2               | Location 1         | 0.2                  | 0.29          |
| 1.2               | Location 1         | 0.1                  | 0.18          |
| 1.2               | Location 2         | 0.5                  | 0.5           |
| 1.2               | Location 2         | 0.4                  | 0.45          |
| 1.2               | Location 2         | 0.3                  | 0.35          |
| 1.2               | Location 2         | 0.2                  | 0.28          |
| 1.2               | Location 2         | 0.1                  | 0.18          |

**Table S. 1** - Experiments conducted at  $d/H = 1.2$

| confinement (d/H) | Recording location | Bulk volume fraction | Area fraction |
|-------------------|--------------------|----------------------|---------------|
| 0.65              | Location 1         | 0.5                  | 0.78          |
| 0.65              | Location 1         | 0.5                  | 0.76          |
| 0.65              | Location 1         | 0.4                  | 0.7           |
| 0.65              | Location 1         | 0.3                  | 0.5           |
| 0.65              | Location 1         | 0.3                  | 0.5           |
| 0.65              | Location 1         | 0.2                  | 0.36          |
| 0.65              | Location 1         | 0.2                  | 0.31          |
| 0.65              | Location 1         | 0.1                  | 0.19          |
| 0.65              | Location 1         | 0.1                  | 0.18          |
| 0.65              | Location 2         | 0.4                  | 0.8           |
| 0.65              | Location 2         | 0.3                  | 0.63          |
| 0.65              | Location 2         | 0.3                  | 0.53          |
| 0.65              | Location 2         | 0.2                  | 0.5           |
| 0.65              | Location 2         | 0.2                  | 0.45          |
| 0.65              | Location 2         | 0.1                  | 0.23          |
| 0.65              | Location 2         | 0.1                  | 0.2           |

**Table S. 2** - Experiments conducted at  $d/H = 0.65$
